# Supplementary material for: Improved Aging Stability of Ethylene-Norbornene Composites Filled with Lawsone-Based Hybrid Pigment
Source: PubMed Central journal article supplement (PMC6523681; doi:10.3390/polym11040723), 2019-04-19
Supplement: polymers-11-00723-s001.pdf [file polymers-11-00723-s001.pdf]

## Supplementary material

# Improved aging stability of ethylene-norbornene composites filled with lawsone-based hybrid pigment

Anna Marzec <sup>1,\*</sup> and Bolesław Szadkowski <sup>1</sup>

<sup>1</sup> Institute of Polymer and Dye Technology, Faculty of Chemistry, Lodz University of Technology, Stefanowskiego 12/16, 90-924 Lodz, Poland

\* Correspondence: anna.marzec@p.lodz.pl

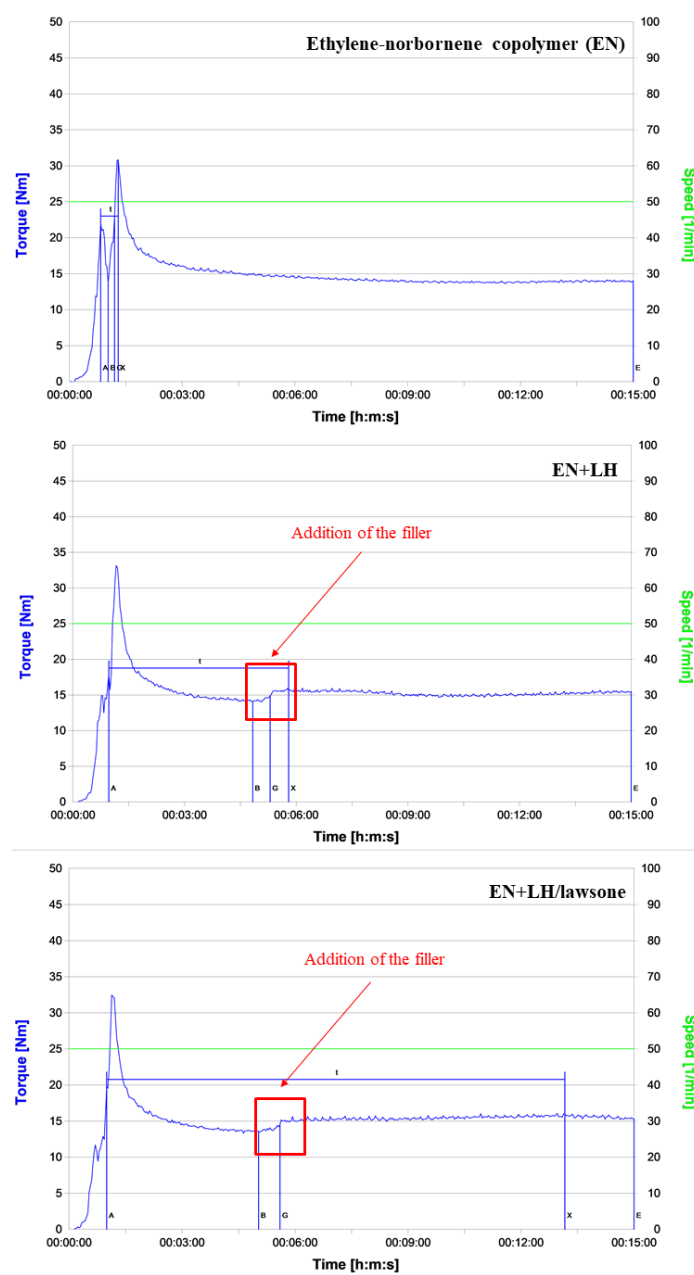

Figure S1. Mixing curves of virgin EN compound and EN filled with LH and hybrid pigment.

**Table S1.** Mechanical properties of studied composites before and after UV aging.

| Polymer compound | T <sub>SB</sub> [MPa] | E <sub>BB</sub> [%] | 150 h                 |                       | 250 h                 |                       | 350 h                 |                       |
|------------------|-----------------------|---------------------|-----------------------|-----------------------|-----------------------|-----------------------|-----------------------|-----------------------|
|                  |                       |                     | T <sub>SA</sub> [MPa] | E <sub>BA</sub> [MPa] | T <sub>SA</sub> [MPa] | E <sub>BA</sub> [MPa] | T <sub>SA</sub> [MPa] | E <sub>BA</sub> [MPa] |
| EN               | 38.5                  | 600                 | 37.6                  | 485                   | 34.9                  | 510                   | 30.0                  | 508                   |
| EN+LH            | 37.8                  | 559                 | 35.9                  | 459                   | 32.0                  | 424                   | 28.0                  | 423                   |
| EN+LH/lawsone    | 38.9                  | 551                 | 38.7                  | 543                   | 36.5                  | 558                   | 36.0                  | 476                   |
